# Supplementary material for: Using a genetic algorithm to derive a highly predictive and context-specific frailty index
Source: publisher site journal article supplement (doi:10.18632/aging.103118), 2020-04-28
Supplement: Supplementary file [file aging-v12i8-103118-supplementary-material-SD1.pdf]

## SUPPLEMENTARY TABLES

**Supplementary Table 1. Baseline characteristics of the SNAC-K population included in the validation sample by age and sex.**

| Characteristics, N (%)                 | Men             | Women           | < 78 Years old  | ≥ 78 Years old  |
|----------------------------------------|-----------------|-----------------|-----------------|-----------------|
|                                        | N = 359 (35.6%) | N = 650 (64.4%) | N = 559 (55.4%) | N = 450 (44.6%) |
| <i>Demographic</i>                     |                 |                 |                 |                 |
| Age, mean (SD)                         | 71.3 (10.2)     | 76.0 (11.2)     | 65.7 (4.8)      | 85.1 (6.0)      |
| Female sex                             | -               | 650 (100.0%)    | 318 (56.9%)     | 332 (73.8%)     |
| Living in institution                  | 6 (1.7%)        | 47 (7.2%)       | 4 (0.7%)        | 49 (10.9%)      |
| <i>Chronic diseases</i>                |                 |                 |                 |                 |
| ≥2 chronic conditions                  | 297 (82.7%)     | 584 (89.8%)     | 443 (79.2%)     | 438 (97.3%)     |
| Dementia                               | 14 (3.9%)       | 74 (11.4%)      | 10 (1.8%)       | 78 (17.3%)      |
| Solid neoplasms                        | 32 (8.9%)       | 50 (7.7%)       | 32 (5.7%)       | 50 (11.1%)      |
| <i>Cognitive and physical function</i> |                 |                 |                 |                 |
| Walking speed ≤ 0.8 m/s                | 49 (14.3%)      | 193 (32.7%)     | 37 (6.8%)       | 205 (52.8%)     |
| ≥1 ADL impaired                        | 13 (3.6%)       | 82 (12.6%)      | 9 (1.6%)        | 86 (19.1%)      |
| ≥1 IADL impaired                       | 341 (95.0%)     | 613 (94.3%)     | 526 (94.1%)     | 428 (95.1%)     |
| MMSE ≤ 27                              | 24 (7.0%)       | 120 (19.5%)     | 24 (4.4%)       | 120 (29.3%)     |
| <i>Outcomes</i>                        |                 |                 |                 |                 |
| 3-year mortality                       | 43 (12.0%)      | 87 (13.4%)      | 15 (2.7%)       | 115 (25.6%)     |
| 6-year mortality                       | 80 (22.3%)      | 186 (28.6%)     | 47 (8.4%)       | 219 (48.7%)     |

Abbreviations: SD = standard deviation; COPD = Chronic Obstructive Pulmonary Disease; m/s = meters per second; ADL = Activities of Daily Living; IADL = Instrumental Activities of Daily Living; MMSE = MiniMental State Examination. Missing: 88 for BMI, 76 for walking speed, 52 for MMSE.

**Supplementary Table 2. Comparison between areas under the curves (AUC, 95% confidence intervals) in the prediction of different outcomes obtained for the ga-FI and c-FI.**

|                            | AUC              | AUC              | p      |
|----------------------------|------------------|------------------|--------|
|                            | Best ga-FI       | c-FI             |        |
| 3-year mortality           | 0.88 (0.85-0.91) | 0.79 (0.73-0.84) | 0.006  |
| 3-year mortality - female  | 0.87 (0.82-0.91) | 0.78 (0.71-0.85) | 0.004  |
| 3-year mortality - male    | 0.90 (0.86-0.94) | 0.80 (0.71-0.89) | 0.048  |
| 3-year mortality - older   | 0.81 (0.77-0.86) | 0.74 (0.66-0.81) | 0.067  |
| 3-year mortality - younger | 0.86 (0.74-0.95) | 0.73 (0.60-0.84) | 0.108  |
| 6-year mortality           | 0.88 (0.86-0.91) | 0.79 (0.75-0.83) | <0.001 |
| 6-year mortality - female  | 0.89 (0.86-0.92) | 0.82 (0.77-0.86) | 0.006  |
| 6-year mortality - male    | 0.86 (0.81-0.90) | 0.75 (0.68-0.81) | 0.007  |
| 6-year mortality - older   | 0.84 (0.80-0.87) | 0.74 (0.68-0.79) | 0.003  |
| 6-year mortality - younger | 0.83 (0.76-0.89) | 0.72 (0.64-0.80) | 0.045  |

All data were obtained employing 2000 stratified bootstrap replicates.
